# Supplementary material for: Translation Inhibition of the Developmental Cycle Protein HctA by the Small RNA IhtA Is Conserved across Chlamydia
Source: PubMed Central journal article supplement (PMC3469542; doi:10.1371/journal.pone.0047439), 2012-10-11
Supplement: pone.0047439.s001.pdf [file pone.0047439.s001.pdf]

**Table S1. Primers for cloning and invitro transcription**

| Primer                            | Sequence                                                            |
|-----------------------------------|---------------------------------------------------------------------|
| <i>hctA</i> forward (common)      | ATGGCGCTAAAAGATACGGC                                                |
| D and L2 <i>hctA</i> reverse      | TTATTTTTTTGTTGAGCGAGTTTTTTTCGCTG                                    |
| muridarum <i>hctA</i> reverse     | TTATTTTTTTGTTGAACGAACTTTTTTCG                                       |
| <i>caviae hctA</i> reverse        | TTATTTTCTTAGGGAGCGAGAAGAATTTTTTTGG                                  |
| <i>pneumoniae hctA</i> reverse    | TTATTTTCTAAATCCGCGTGCTTTGGAAGG                                      |
| D <i>ihfA</i> forward             | TATTCGTGATAAACTGACAAAAATTGTATCC                                     |
| D <i>ihfA</i> reverse             | CCTACGCGTTACGAATGCGTTGCTCTACC                                       |
| <i>caviae ihfA</i> forward        | TTTACAAGTTCAGATGGATGTTTCTTAG                                        |
| <i>caviae ihfA</i> reverse        | CTTTAGAAGTCCCTGCCTTCCACTAAGAAG                                      |
| muridarum <i>ihfA</i> forward     | TAATCAAAGGACTCTTTAGCCGAACAATCG                                      |
| muridarum <i>ihfA</i> reverse     | ACTGAGCTATTTAGGCTAACTTACAAAAAGC                                     |
| <i>pneumoniae ihfA</i> forward    | ACGCAATATCATGATGTTTATTAAGCCTAAGG                                    |
| <i>pneumoniae ihfA</i> reverse    | CCAAGTGAAGCTATTTAGGCATGTCGTAGG                                      |
| <b>Invitro transcription</b>      |                                                                     |
| T7 L2, D forward                  | <u>TAATACGACTCACTATAGGGAAGTTGGTATTCTAACGCCATGGAATAGC</u>            |
| T7 muridarum <i>ihfA</i> forward  | <u>TAATACGACTCACTATAGGGATAAAGTTGCAAGTTGGTATTCTAACGCCATGG</u>        |
| T7 <i>caviae ihfA</i> forward     | <u>TAATACGACTCACTATAGGGATAGAAAAATAAGATGATATTCTACGCCATGG</u>         |
| T7 <i>pneumoniae ihfA</i> forward | <u>TAATACGACTCACTATAGGGATAAAGAGGAAGATGATATTCTCCGCCGTGG</u>          |
| T7 <i>ihfA</i> antisense forward  | <u>TAATACGACTCACTATAGGGCCATAAAAAGCCAAGAGAACC GGAGATACG</u>          |
| L2, D <i>ihfA</i> reverse         | AAAGCCAAGAGAACCGGAGATACGGCTAACTCC                                   |
| muridarum <i>ihfA</i> reverse     | AAAAAGCCAAGAGAAGTGGAGACACGGCTAAC                                    |
| <i>caviae ihfA</i> reverse        | AAAGCCAAGAAAACAACAATCATAAG                                          |
| <i>pneumoniae ihfA</i> reverse    | AAAGCCAAGAAAACATAAAGTTATAC                                          |
| <i>ihfA</i> sense reverse         | AAAGCCAAGAGAACCGGAGATACG                                            |
| <i>ihfA</i> antisense reverse     | AAGTTGGTATTCTAACGCCATGGAATAGC                                       |
| T7 L2, D <i>hctA</i> forward      | <u>TAATACGACTCACTATAGGGTAAAACTGAAAAAATAGTTTAAAACAACAAC</u>          |
| T7 muridarum <i>hctA</i> forward  | <u>TAATACGACTCACTATAGGGTAAAACTAAAAAATAGTTTAAAACAACG</u>             |
| T7 <i>caviae hctA</i> forward     | <u>TAATACGACTCACTATAGGGTAAAAATAAAACAAGTAAAAATAGTTTAAAAC</u>         |
| T7 <i>pneumoniae hctA</i> forward | <u>TAATACGACTCACTATAGGGATAAAACAAGTAAAAATAGTTTAAAACAGC</u>           |
| L2,D <i>hctA</i> reverse          | TTTTTTTTTTTTTTTTTTTTTTTTTTTTTTTTTTTTTTGTTGAGCGAGTTTTTTTCGCTG        |
| muridarum <i>hctA</i> reverse     | TTTTTTTTTTTTTTTTTTTTTTTTTTTTTTTTTTTTTTGTTGAACGAACTTTTTTCGTCACCTTAGC |
| <i>caviae hctA</i> reverse        | TTTTTTTTTTTTTTTTTTTTTTTTTTTTTTTTTTTTTCTAAATCCGCGTGCTTTGGAAGG        |
| <i>pneumoniae hctA</i> reverse    | TTTTTTTTTTTTTTTTTTTTTTTTTTTTTTTTTTTTTCTAAATCCGCGTGCTTTGGAAGG        |

Underlined sequence indicates the T7 promoter.
